# Supplementary material
Source: PubMed Central journal article supplement (PMC3890798)
Supplement: 1321697111_pnas.201321697SI.pdf [file 1321697111_pnas.201321697SI.pdf]

# Supporting Information

Chen et al. 10.1073/pnas.1321697111

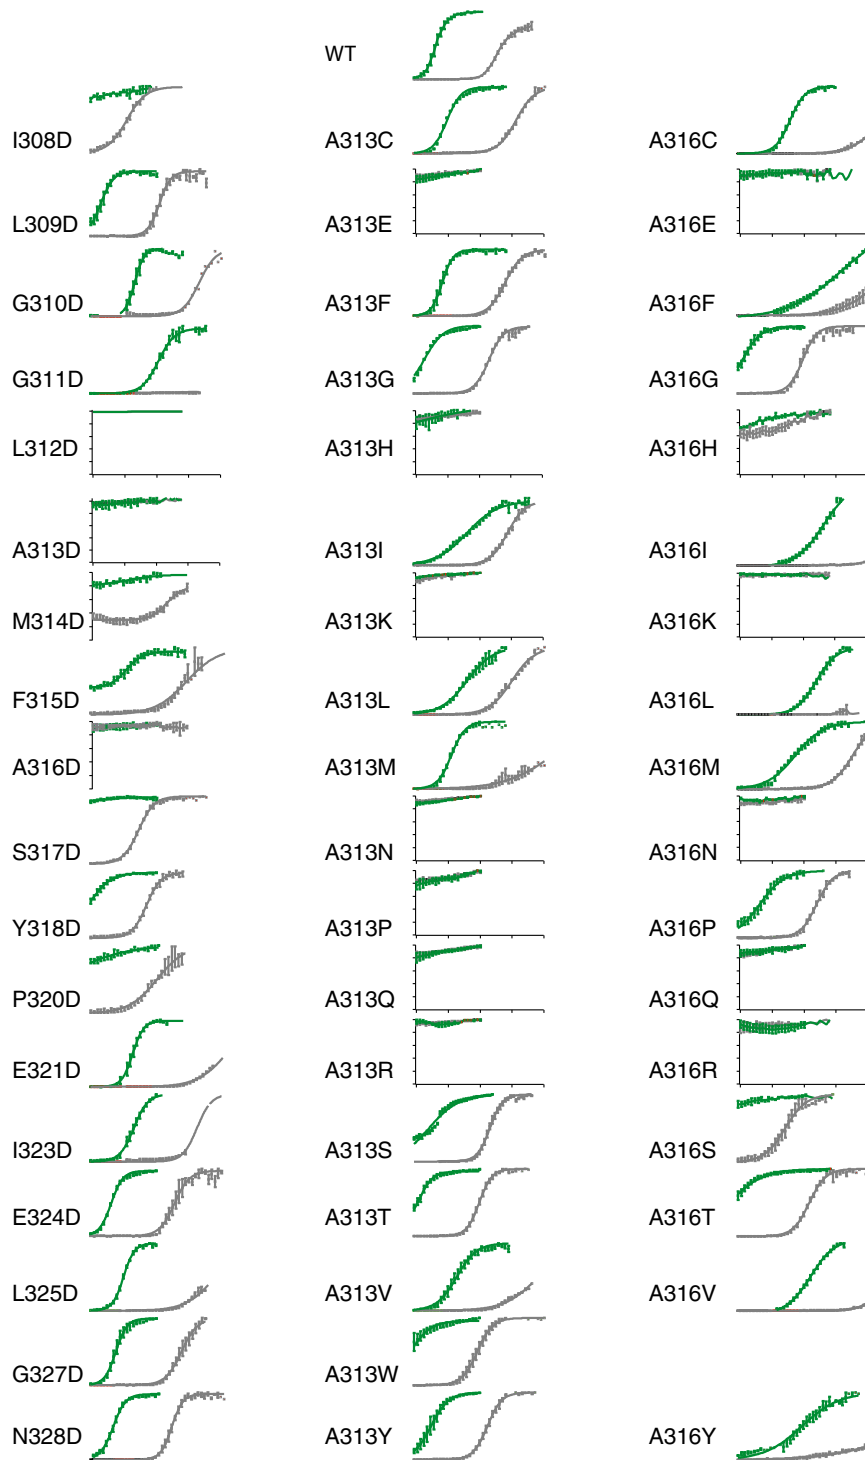

Fig. S1. Steady-state  $G$ - $V$  curves of wild-type and mutant BK channels in 0 (gray) and 85  $\mu\text{M}$   $\text{Ca}^{2+}$  (green). For each panel,  $G/G_{\text{max}}$  (ranging from 0 to 1) was plotted against voltage (ranging from  $-100$  to  $+300$  mV). Error bars represent SEM.

**Table S1. Characterization of steady-state gating for single aspartate substitutions along BK S6**

| Channel | 0 Ca <sup>2+</sup>    |            |                      | 85 μM Ca <sup>2+</sup> |            |                      | n  |
|---------|-----------------------|------------|----------------------|------------------------|------------|----------------------|----|
|         | V <sub>1/2</sub> , mV | z          | G/G <sub>max</sub> * | V <sub>1/2</sub> , mV  | z          | G/G <sub>max</sub> * |    |
| WT      | 163 ± 0.8             | 1.0 ± 0.03 | 0.5                  | -34 ± 0.5              | 1.4 ± 0.04 | 0.5                  | 3  |
| I308D   | 11 ± 0.5              | 0.8 ± 0.03 | 0.99                 | NA                     | NA         | 0.91                 | 4  |
| L309D   | 232 ± 1.5             | 1.0 ± 0.05 | 0.06                 | 35 ± 0.6               | 1.7 ± 0.06 | 0.01                 | 4  |
| G310D   | 108 ± 1.5             | 1.4 ± 0.09 | 0.96                 | -69 ± 1.1              | 1.3 ± 0.07 | 0.86                 | 3  |
| G311D   | NA                    | NA         | 0                    | 107 ± 1.2              | 1.0 ± 0.04 | 0.004                | 3  |
| L312D   | NA                    | NA         | 1                    | NA                     | NA         | 1                    | 3  |
| A313D   | NA                    | NA         | 1                    | NA                     | NA         | 1                    | 3  |
| M314D   | 130 ± 5.2             | 1.4 ± 0.11 | 0.89                 | NA                     | NA         | 1                    | 6  |
| F315D   | 186 ± 3.0             | 0.5 ± 0.03 | 0.38                 | 7 ± 2.3                | 1.0 ± 0.08 | 0.49                 | 5  |
| A316D   | NA                    | NA         | 1                    | NA                     | NA         | 1                    | 6  |
| S317D   | 45 ± 0.8              | 1.0 ± 0.03 | 0.99                 | NA                     | NA         | 0.96                 | 5  |
| Y318D   | 70 ± 0.6              | 1.1 ± 0.03 | 0.98                 | -107 ± 0.8             | 0.7 ± 0.02 | 0.9                  | 6  |
| V319D   | NC                    | NC         | NC                   | NC                     | NC         | NC                   | NC |
| P320D   | 97 ± 2.1              | 0.6 ± 0.03 | 0.83                 | NA                     | NA         | 0.86                 | 4  |
| E321D   | 311 ± 2.0             | 0.6 ± 0.02 | 0.03                 | 27 ± 1.9               | 1.5 ± 0.14 | 0.02                 | 5  |
| I322D   | NC                    | NC         | NC                   | NC                     | NC         | NC                   | NC |
| I323D   | 225 ± 0.8             | 1.1 ± 0.04 | 0.06                 | 32 ± 0.7               | 1.1 ± 0.03 | 0.04                 | 4  |
| E324D   | 156 ± 1.5             | 1.1 ± 0.06 | 0.57                 | -37 ± 0.8              | 1.4 ± 0.05 | 0.54                 | 5  |
| L325D   | 281 ± 3.5             | 0.6 ± 0.03 | 0.06                 | 1 ± 0.5                | 1.5 ± 0.04 | 0.11                 | 7  |
| I326D   | NC                    | NC         | NC                   | NC                     | NC         | NC                   | NC |
| G327D   | 176 ± 0.7             | 1.0 ± 0.03 | 0.37                 | -23 ± 0.9              | 1.4 ± 0.06 | 0.35                 | 3  |
| N328D   | 140 ± 0.7             | 1.5 ± 0.05 | 0.80                 | -39 ± 0.7              | 1.3 ± 0.04 | 0.56                 | 5  |

NA, not applicable; NC, no current.

\*Measured at V<sub>1/2</sub> of wild type.

**Table S2. Characterization of steady-state gating for L312X BK channels**

| Channel | 0 Ca <sup>2+</sup>    |             |                      | 85 μM Ca <sup>2+</sup> |             |                      | n     |
|---------|-----------------------|-------------|----------------------|------------------------|-------------|----------------------|-------|
|         | V <sub>1/2</sub> , mV | z           | G/G <sub>max</sub> * | V <sub>1/2</sub> , mV  | z           | G/G <sub>max</sub> * |       |
| WT      | 163 ± 0.8             | 1.0 ± 0.03  | 0.5                  | -34 ± 0.5              | 1.4 ± 0.04  | 0.5                  | 3     |
| L312A   | 31 ± 2.6              | 1.2 ± 0.05  | 1                    | NA                     | NA          | 0.93                 | 15, 3 |
| L312C   | NA                    | NA          | 1                    | NA                     | NA          | 0.89                 | 4     |
| L312D   | NA                    | NA          | 1                    | NA                     | NA          | 0.99                 | 3     |
| L312E   | NC                    | NC          | NC                   | NC                     | NC          | NC                   | NC    |
| L312F   | 186 ± 6.0             | 1.01 ± 0.12 | 0.29                 | 1 ± 8.2                | 1.49 ± 0.01 | 0.12                 | 3     |
| L312G   | NA                    | NA          | 1                    | NA                     | NA          | 0.93                 | 5     |
| L312H   | NA                    | NA          | NA                   | NA                     | NA          | NA                   | NA    |
| L312I   | 86 ± 3.4              | 0.93 ± 0.02 | 0.94                 | NA                     | NA          | 0.5                  | 10, 3 |
| L312K   | NA                    | NA          | NA                   | NA                     | NA          | NA                   | NA    |
| L312M   | 170 ± 13.1            | 1.06 ± 0.11 | 0.43                 | -30 ± 5.0              | 1.39 ± 0.10 | 0.45                 | 3     |
| L312N   | NA                    | NA          | 1                    | NA                     | NA          | 1                    | 3     |
| L312P   | NC                    | NC          | NC                   | NC                     | NC          | NC                   | NC    |
| L312Q   | NA                    | NA          | 1                    | NA                     | NA          | 1                    | 5     |
| L312R   | NC                    | NC          | NC                   | NC                     | NC          | NC                   | NC    |
| L312S   | NA                    | NA          | 0.99                 | NA                     | NA          | 0.92                 | 3     |
| L312T   | NA                    | NA          | 0.98                 | NA                     | NA          | 0.85                 | 3     |
| L312V   | NA                    | NA          | 0.98                 | NA                     | NA          | 0.81                 | 4     |
| L312W   | NC                    | NC          | NC                   | NC                     | NC          | NC                   | NC    |
| L312Y   | NC                    | NC          | NC                   | NC                     | NC          | NC                   | NC    |

NA, not applicable; NC, no current.

\*Measured at V<sub>1/2</sub> of wild type.

**Table S3. Characterization of steady-state gating for A313X BK channels**

| Channel | 0 Ca <sup>2+</sup>    |            |                      | 85 $\mu$ M Ca <sup>2+</sup> |            |                      | n |
|---------|-----------------------|------------|----------------------|-----------------------------|------------|----------------------|---|
|         | V <sub>1/2</sub> , mV | z          | G/G <sub>max</sub> * | V <sub>1/2</sub> , mV       | z          | G/G <sub>max</sub> * |   |
| WT      | 163 ± 0.8             | 1.0 ± 0.03 | 0.5                  | -34 ± 0.5                   | 1.4 ± 0.04 | 0.5                  | 3 |
| A313C   | 212 ± 0.7             | 0.9 ± 0.02 | 0.15                 | 1 ± 1.1                     | 1.2 ± 0.05 | 0.16                 | 3 |
| A313D   | NA                    | NA         | 1                    | NA                          | NA         | 0.92                 | 3 |
| A313E   | NA                    | NA         | 1                    | NA                          | NA         | 0.89                 | 4 |
| A313F   | 178 ± 0.8             | 0.9 ± 0.02 | 0.36                 | -14 ± 0.6                   | 1.5 ± 0.05 | 0.23                 | 3 |
| A313G   | 129 ± 1.0             | 1.1 ± 0.04 | 0.82                 | -68 ± 2.4                   | 0.8 ± 0.04 | 0.76                 | 5 |
| A313H   | NA                    | NA         | 1                    | NA                          | NA         | 0.87                 | 4 |
| A313I   | 185 ± 0.7             | 0.9 ± 0.02 | 0.31                 | 62 ± 1.5                    | 0.5 ± 0.14 | 0.12                 | 4 |
| A313K   | NA                    | NA         | 1                    | NA                          | NA         | 0.97                 | 4 |
| A313L   | 200 ± 1.3             | 0.7 ± 0.02 | 0.26                 | 62 ± 1.2                    | 0.6 ± 0.02 | 0.08                 | 3 |
| A313M   | 326 ± 5.7             | 0.3 ± 0.02 | 0.1                  | 15 ± 1.4                    | 1.2 ± 0.06 | 0.09                 | 3 |
| A313N   | NA                    | NA         | 1                    | NA                          | NA         | 1                    | 4 |
| A313P   | NA                    | NA         | 1                    | NA                          | NA         | 1                    | 3 |
| A313Q   | NA                    | NA         | 1                    | NA                          | NA         | 1                    | 3 |
| A313R   | NA                    | NA         | 1                    | NA                          | NA         | 1                    | 3 |
| A313S   | 91 ± 0.8              | 1.0 ± 0.03 | 0.95                 | -141 ± 2.6                  | 0.4 ± 0.02 | 0.87                 | 5 |
| A313T   | 99 ± 0.4              | 1.3 ± 0.02 | 0.96                 | -86 ± 1.0                   | 1.1 ± 0.05 | 0.91                 | 6 |
| A313V   | 269 ± 2.5             | 0.5 ± 0.02 | 0.1                  | 27 ± 1.3                    | 0.8 ± 0.03 | 0.11                 | 9 |
| A313W   | 94 ± 0.4              | 1.0 ± 0.02 | 0.95                 | -105 ± 3.0                  | 0.8 ± 0.06 | 0.92                 | 4 |
| A313Y   | 124 ± 0.4             | 1.1 ± 0.02 | 0.85                 | -48 ± 0.7                   | 0.9 ± 0.02 | 0.63                 | 7 |

NA, not applicable; NC, no current.

\*Measured at V<sub>1/2</sub> of wild type.

**Table S4. Characterization of steady-state gating for A316X BK channels**

| Channel | 0 Ca <sup>2+</sup>    |            |                      | 85 $\mu$ M Ca <sup>2+</sup> |            |                      | n  |
|---------|-----------------------|------------|----------------------|-----------------------------|------------|----------------------|----|
|         | V <sub>1/2</sub> , mV | z          | G/G <sub>max</sub> * | V <sub>1/2</sub> , mV       | z          | G/G <sub>max</sub> * |    |
| WT      | 163 ± 0.8             | 1.0 ± 0.03 | 0.5                  | -34 ± 0.5                   | 1.4 ± 0.04 | 0.5                  | 3  |
| A316C   | 343 ± 1.8             | 0.6 ± 0.01 | 0.01                 | 64 ± 0.7                    | 1.1 ± 0.03 | 0.01                 | 5  |
| A316D   | NA                    | NA         | 0.99                 | NA                          | NA         | 0.99                 | 6  |
| A316E   | NA                    | NA         | 0.99                 | NA                          | NA         | 0.99                 | 3  |
| A316F   | 327 ± 1.6             | 0.4 ± 0.01 | 0.03                 | 211 ± 6.5                   | 0.3 ± 0.01 | 0.02                 | 4  |
| A316G   | 97 ± 2.6              | 1.1 ± 0.11 | 0.95                 | -86 ± 1.1                   | 0.9 ± 0.03 | 0.86                 | 3  |
| A316H   | NA                    | NA         | 0.99                 | NA                          | NA         | 0.76                 | 3  |
| A316I   | 353 ± 39.2            | 0.7 ± 0.06 | 0.003                | 150 ± 6.4                   | 0.6 ± 0.06 | 0.01                 | 3  |
| A316K   | NA                    | NA         | 0.98                 | NA                          | NA         | 0.98                 | 3  |
| A316L   | NA                    | NA         | 0                    | 140 ± 1.1                   | 0.8 ± 0.02 | 0.003                | 3  |
| A316M   | 244 ± 0.6             | 0.8 ± 0.02 | 0.07                 | 72 ± 2.0                    | 0.6 ± 0.02 | 0.07                 | 4  |
| A316N   | NA                    | NA         | 1                    | NA                          | NA         | 0.92                 | 3  |
| A316P   | 140 ± 0.7             | 1.0 ± 0.02 | 0.72                 | -34 ± 1.7                   | 0.7 ± 0.03 | 0.50                 | 6  |
| A316Q   | NA                    | NA         | 1                    | NA                          | NA         | 0.90                 | 4  |
| A316R   | NA                    | NA         | 0.99                 | NA                          | NA         | 0.87                 | 3  |
| A316S   | 40 ± 1.6              | 0.8 ± 0.03 | 0.98                 | NA                          | NA         | 0.93                 | 4  |
| A316T   | 117 ± 1.0             | 1.0 ± 0.03 | 0.86                 | -126 ± 3.2                  | 0.5 ± 0.02 | 0.86                 | 5  |
| A316V   | 358 ± 2.4             | 0.7 ± 0.02 | 0.003                | 121 ± 1.3                   | 0.7 ± 0.03 | 0.01                 | 3  |
| A316W   | NC                    | NC         | NC                   | NC                          | NC         | NC                   | NC |
| A316Y   | 439 ± 10.1            | 0.2 ± 0.01 | 0.07                 | 96 ± 2.3                    | 0.4 ± 0.02 | 0.09                 | 3  |

NA, not applicable; NC, no current.

\*Measured at V<sub>1/2</sub> of wild type.
